# Supplementary material
Source: MDPI journal article supplement (https://www.mdpi.com/2073-4441/16/7/1017)
Supplement: s1 [file s1 › water-2858483-supplementary.pdf]

## SUPPLEMENTARY MATERIALS

### Review

### A sustainability approach between Water-Energy-Food Nexus and Clean Energy

#### Supplementary Materials:

**Table S1.** The top 20 countries are researching the relationship among the WEF nexus, clean energy, and sustainability of the 179 analysed documents.

| Country       | Documents (%) | Hydropower | Bioenergy | REM | Solar | Wind | Ocean |
|---------------|---------------|------------|-----------|-----|-------|------|-------|
| China         | 10.00         | X          | X         | X   | X     |      |       |
| United States | 9.49          | X          | X         | X   | X     | X    |       |
| India         | 7.26          | X          | X         | X   | X     |      |       |
| Brazil        | 5.08          |            | X         | X   | X     |      |       |
| South Africa  | 5.02          |            | X         | X   | X     |      |       |
| Egypt         | 3.91          |            |           | X   | X     |      |       |
| Ethiopia      | 3.91          | X          | X         | X   | X     |      |       |
| Pakistan      | 3.91          | X          | X         | X   |       |      |       |
| Jordan        | 3.35          | X          |           | X   |       |      |       |
| Alegría       | 2.79          |            |           | X   | X     |      |       |
| Morocco       | 2.79          |            |           | X   | X     |      |       |
| Spain         | 2.79          | X          |           | X   |       | X    |       |
| Bangladesh    | 2.23          | X          |           | X   |       |      |       |
| Germany       | 2.23          |            | X         | X   |       |      |       |
| Italy         | 2.23          |            | X         | X   |       |      |       |
| Lebanon       | 2.23          |            |           | X   |       |      |       |
| Mexico        | 2.23          |            | X         | X   | X     |      | X     |
| Uzbekistan    | 2.23          | X          | X         | X   |       |      |       |
| Iraq          | 1.67          | X          | X         |     |       |      |       |
| Netherlands   | 1.67          |            | X         |     | X     |      |       |

**Note:** The percentage (%) is relative to 179 papers analysed; ND (number of documents). REM (renewable energy mix).
